# Supplementary material for: Polymers of intrinsic microporosity/metal–organic framework hybrid membranes with improved interfacial interaction for high-performance CO2 separation
Source: Royal Society of Chemistry journal article supplement (doi:10.1039/c7ta01773a), 2017-01-01
Supplement: c7ta01773a1.pdf [file c7ta01773a1.pdf]

## Supporting Information

### Polymer of Intrinsic Microporosity/Metal Organic Framework Hybrid Membrane with Improved Interfacial Interaction for High-performance CO<sub>2</sub> Separation

Zhengong Wang,<sup>†a,b</sup> Huiting Ren,<sup>†a,b</sup> Shenxiang Zhang,<sup>a,c</sup> Feng Zhang,<sup>a</sup> and Jian Jin\*<sup>a</sup>

a. CAS Key Laboratory of Nano-Bio Interface, i-Lab, Suzhou Institute of Nano-Tech and Nano-Bionics, Chinese Academy of Sciences, Suzhou 215123, China.

b. University of Chinese Academy of Sciences, Beijing 100049, China

c. School of Nano-Tech and Nano-Bionics, University of Science and Technology of China, Hefei 230026, China.

#### 1. Supplementary Figures

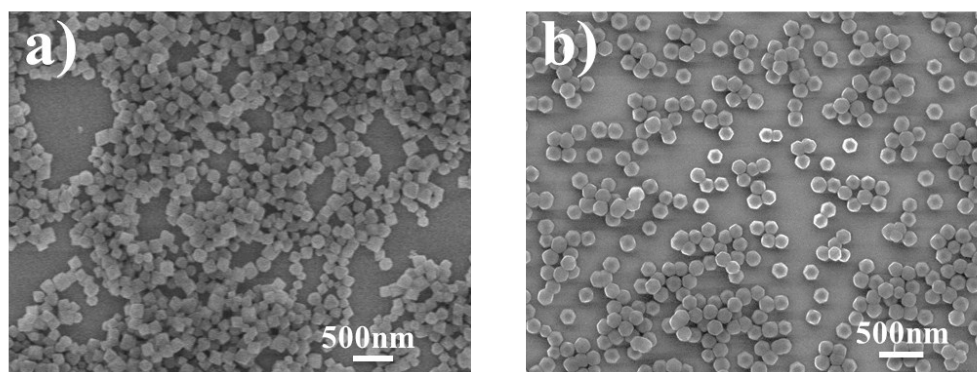

**Figure S1.** SEM image of (a) NH<sub>2</sub>-UiO-66 and (b) UiO-66 nanoparticles.

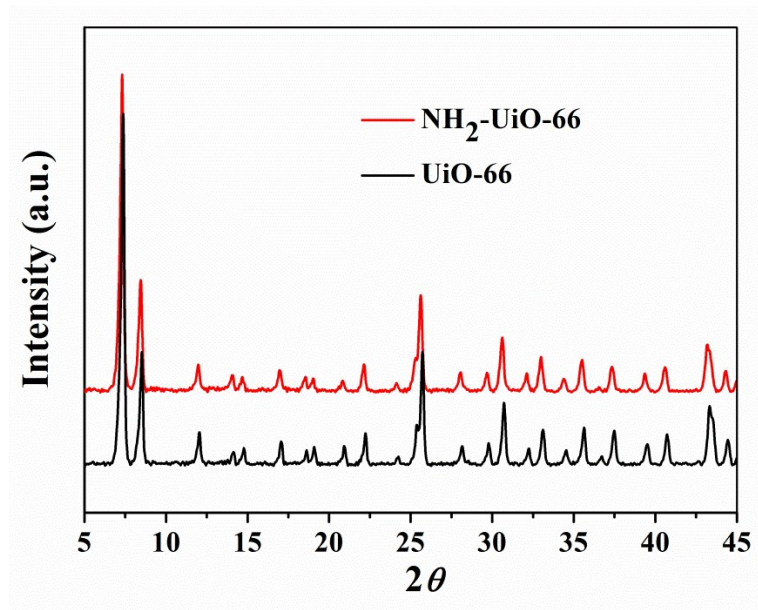

Figure S2. XRD patterns of UiO-66 and NH<sub>2</sub>-UiO-66.

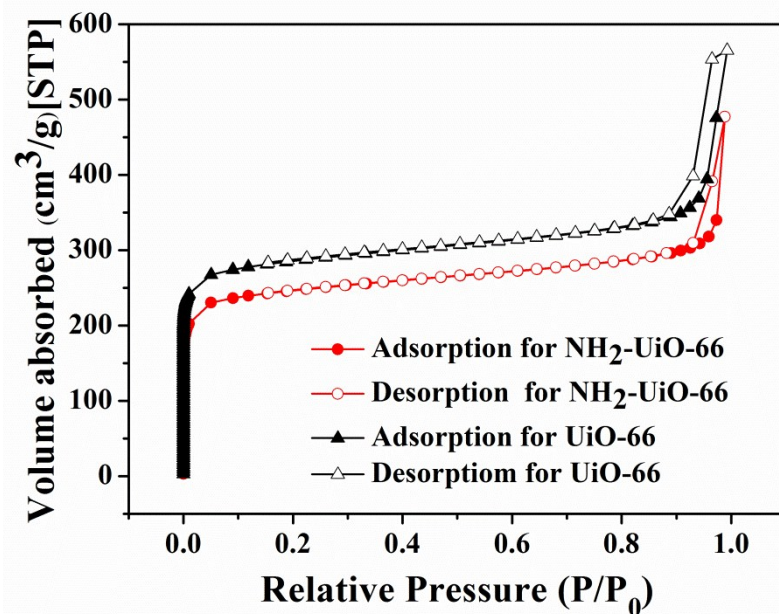

Figure S3. Nitrogen adsorption isotherms of NH<sub>2</sub>-UiO-66 and UiO-66 measured at 77 K.

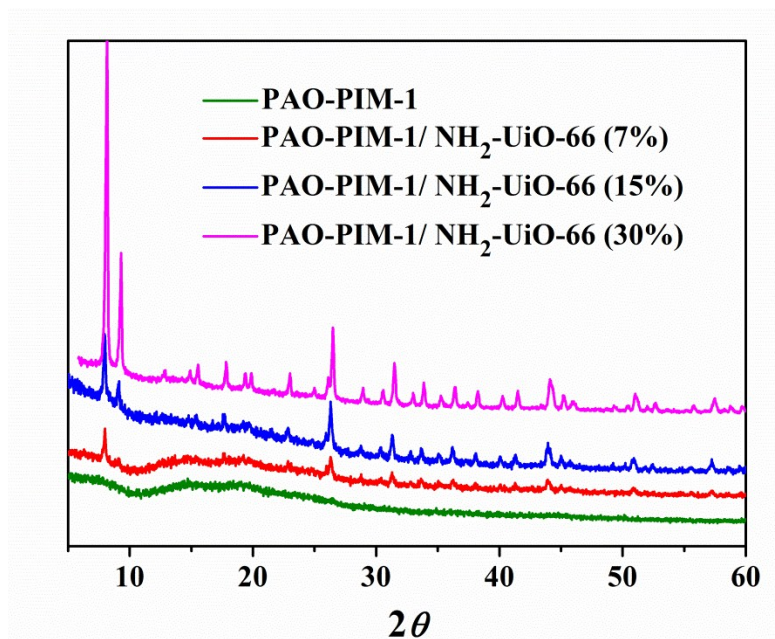

**Figure S4.** X-ray diffraction patterns of PAO-PIM-1/ NH<sub>2</sub>-UiO-66 hybrid membranes.

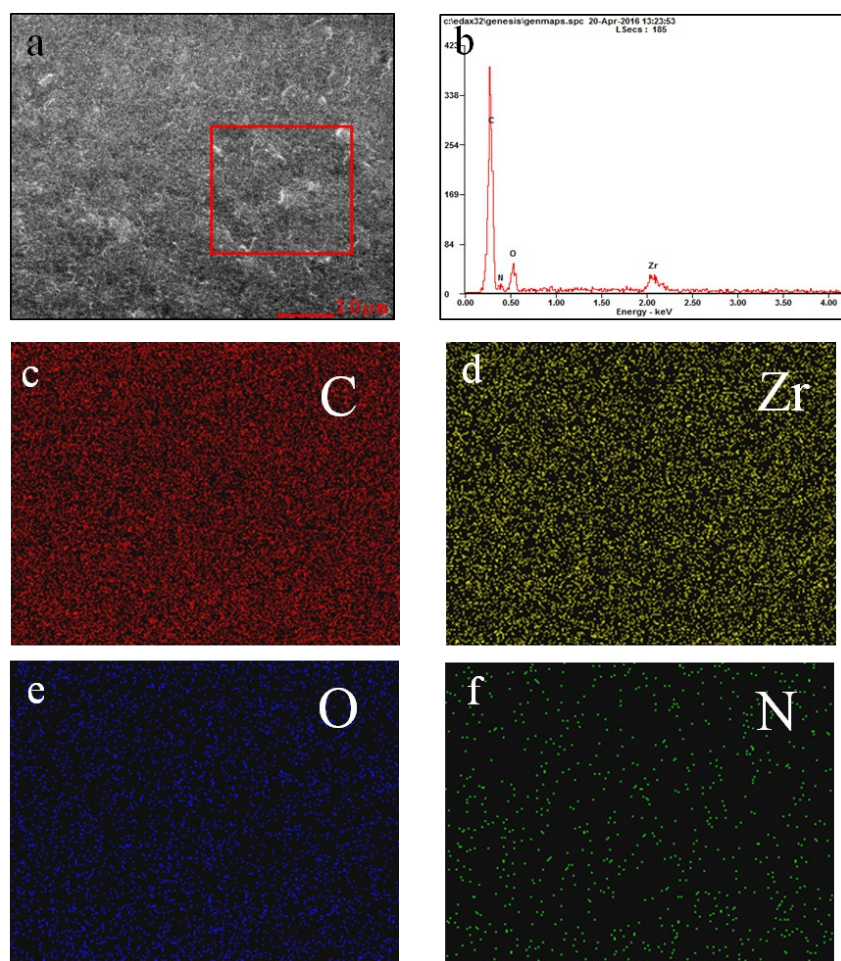

**Figure S5.** Cross-sectional SEM-EDX of PAO-PIM-1/NH<sub>2</sub>-UiO-66 membrane. (a) SEM, (b) EDX spectra, and element mapping of (c) carbon, (d) zirconium, (e) oxygen, and (f) nitrogen.

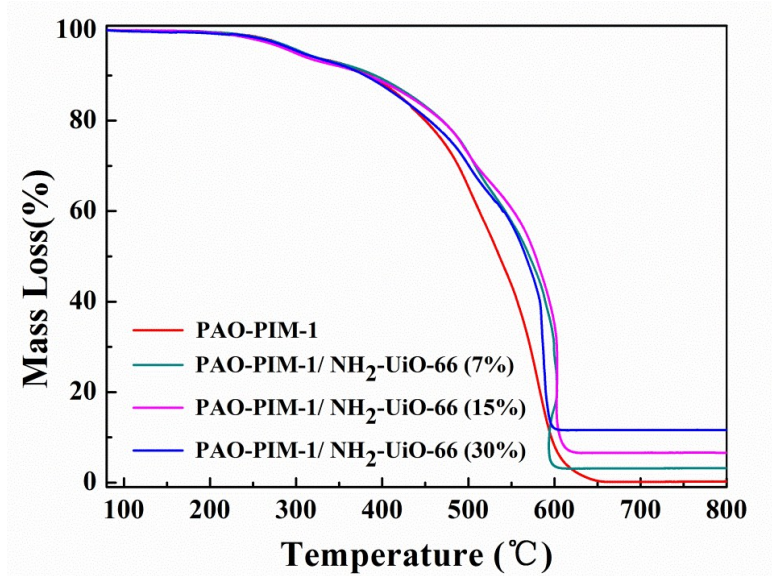

**Figure S6.** Thermogravimetry (TG) analysis of PAO-PIM-1 and PAO-PIM-1/NH<sub>2</sub>-UiO-66 with different NH<sub>2</sub>-UiO-66 loadings.



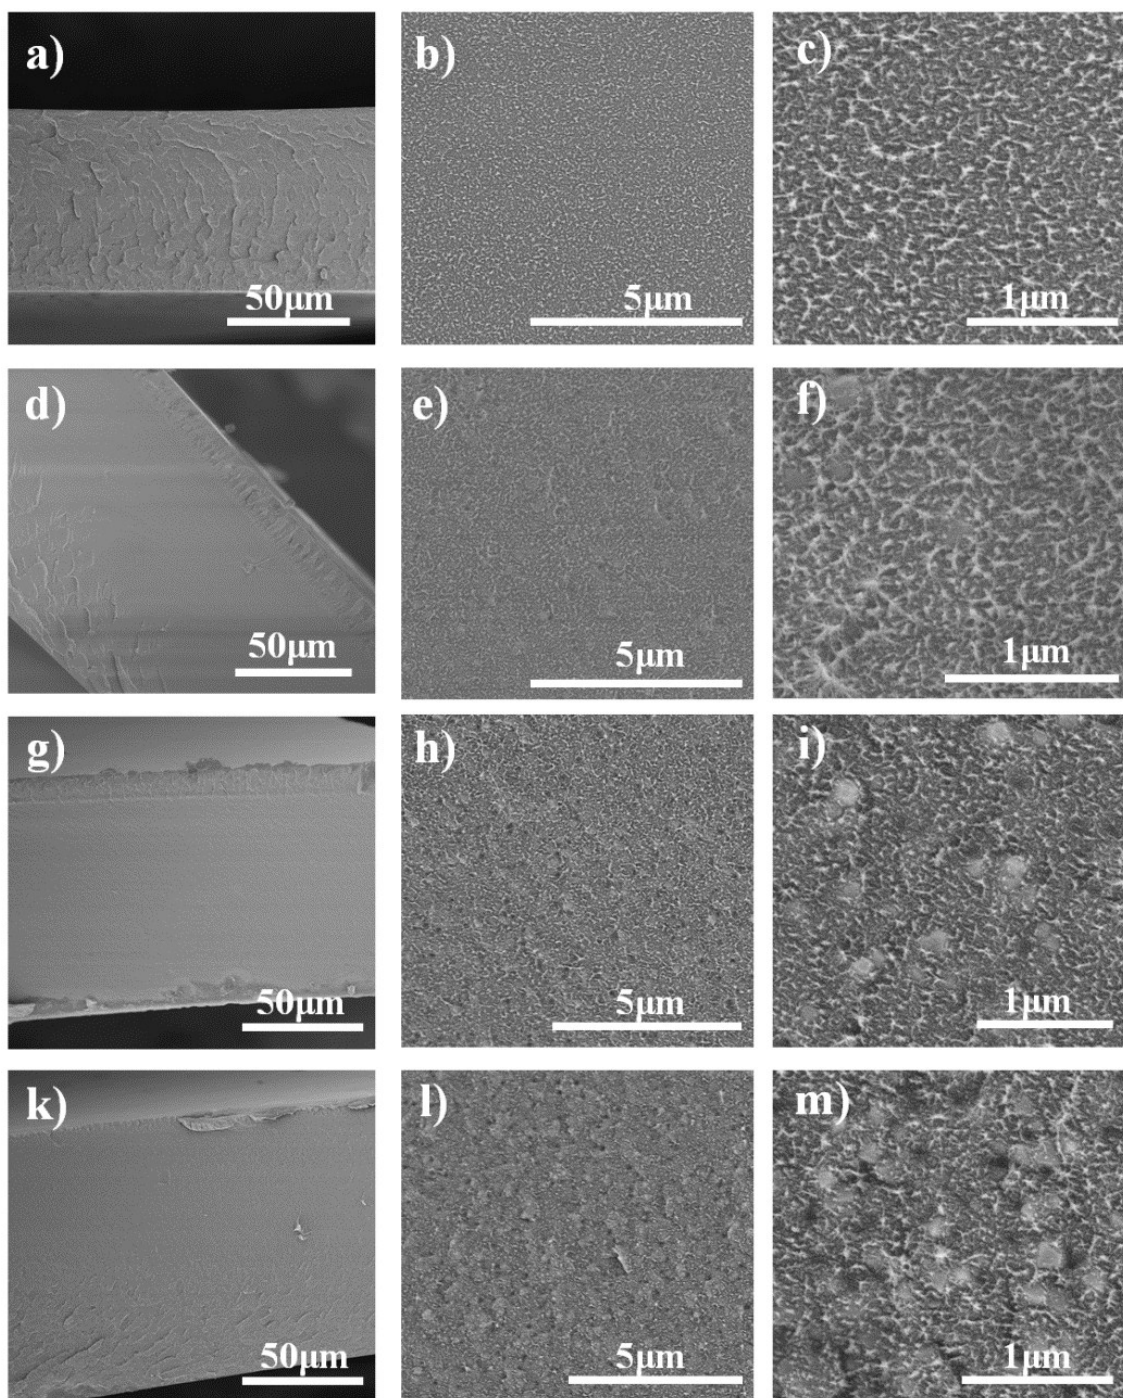

**Figure S7.** Cross-sectional SEM images with different magnifications of a-c) PAO-PIM-1, d-f) PAO-PIM-1/NH<sub>2</sub>-UiO-66 (7%), g-i) PAO-PIM-1/NH<sub>2</sub>-UiO-66 (15%), k-m) PAO-PIM-1/NH<sub>2</sub>-UiO-66 (30%).

## 2. Supplementary Tables

**Table S1.** Diffusion coefficient ( $D$ ), solubility coefficient ( $S$ ), diffusion selectivity ( $\alpha_D$ ), and solubility selectivity ( $\alpha_S$ ) for different gases ( $N_2$ ,  $CH_4$ ,  $CO_2$ ) of pure PAO-PIM-1 membrane, PAO-PIM-1-NH<sub>2</sub>-UiO-66 (7%), PAO-PIM-1-NH<sub>2</sub>-UiO-66 (15%), and PAO-PIM-1-NH<sub>2</sub>-UiO-66 (30%) membranes.

| Membranes                               | D ( $10^{-8} \text{cm}^2/\text{g}$ ) |                 |                 | S ( $10^{-2} \text{cm}^3/\text{cm}^3 \text{cmHg}^{-1}$ ) |                 |                 | CO <sub>2</sub> /N <sub>2</sub> |            | CO <sub>2</sub> /CH <sub>4</sub> |            |
|-----------------------------------------|--------------------------------------|-----------------|-----------------|----------------------------------------------------------|-----------------|-----------------|---------------------------------|------------|----------------------------------|------------|
|                                         | N <sub>2</sub>                       | CH <sub>4</sub> | CO <sub>2</sub> | N <sub>2</sub>                                           | CH <sub>4</sub> | CO <sub>2</sub> | $\alpha_D$                      | $\alpha_S$ | $\alpha_D$                       | $\alpha_S$ |
| PAO-PIM-1                               | 59.7                                 | 11.3            | 54.4            | 1.72                                                     | 10.7            | 53.3            | 0.91                            | 31         | 4.81                             | 4.98       |
| PAO-PIM-1/NH <sub>2</sub> -UiO-66 (7%)  | 57                                   | 22.3            | 136             | 2.32                                                     | 7.08            | 28.1            | 2.38                            | 12.1       | 6.1                              | 3.97       |
| PAO-PIM-1/NH <sub>2</sub> -UiO-66 (15%) | 106                                  | 36              | 224             | 1.52                                                     | 5.93            | 21.6            | 2.11                            | 14.2       | 6.22                             | 3.64       |
| PAO-PIM-1/NH <sub>2</sub> -UiO-66 (30%) | -                                    | 67.7            | 650             | -                                                        | 5.58            | 13.0            | -                               | -          | 9.6                              | 2.33       |
| PAO-PIM-1/UiO-66 (30%)                  |                                      | 74.9            | 1154            |                                                          | 5.98            | 7.16            |                                 |            | 15.4                             | 1.2        |

**Table S2.** Mixed gas performance of PAO-PIM-1/NH<sub>2</sub>-UiO-66 (30%) membrane for CO<sub>2</sub>/N<sub>2</sub> gas pairs. The mixed gas permeation was tested at a pressure of 1 bar. The gas composition was determined via a calibrated gas chromatograph.

| CO <sub>2</sub> /CH <sub>4</sub> gas ratio (Volume ratio) | $P_{CO_2}$ (barrer) | $a$ (CO <sub>2</sub> /CH <sub>4</sub> ) |
|-----------------------------------------------------------|---------------------|-----------------------------------------|
| Pure gas                                                  | 8425                | 23                                      |
| 3:7                                                       | 8271                | 26.6                                    |
| 1:1                                                       | 8329                | 27.6                                    |
| 7:3                                                       | 8322                | 28.5                                    |

**Table S3.** Mixed gas performance of PAO-PIM-1/NH<sub>2</sub>-UiO-66 (30%) membrane for CO<sub>2</sub>/N<sub>2</sub> gas pairs. The mixed gas permeation was tested at a pressure of 1 bar. The gas composition was determined via a calibrated gas chromatograph.

| <b>CO<sub>2</sub>/N<sub>2</sub> gas ratio<br/>(Volume ratio)</b> | <b><i>P</i><sub>CO<sub>2</sub></sub><br/>(barrer)</b> | <b><i>a</i> (CO<sub>2</sub>/N<sub>2</sub>)</b> |
|------------------------------------------------------------------|-------------------------------------------------------|------------------------------------------------|
| Pure gas                                                         | 8425                                                  | 27.5                                           |
| 3:7                                                              | 8351                                                  | 31.5                                           |
| 1:1                                                              | 8541                                                  | 33.9                                           |
| 7:3                                                              | 8446                                                  | 34.9                                           |

**Table S4.** Aging performance of PAO-PIM-1/NH<sub>2</sub>-UiO-66 (30%) hybrid membrane.

| <b>PAO-PIM-1/NH<sub>2</sub>-<br/>UiO-66 (30%)</b> | <b>Permeability (barrer)</b> |                       |                      | <b>Ideal selectivity (<math>\alpha</math>)</b> |                                     |
|---------------------------------------------------|------------------------------|-----------------------|----------------------|------------------------------------------------|-------------------------------------|
|                                                   | <b>Aging (days)</b>          | <b>CO<sub>2</sub></b> | <b>N<sub>2</sub></b> | <b>CH<sub>4</sub></b>                          | <b>CO<sub>2</sub>/N<sub>2</sub></b> |
| 1d                                                | 8425                         | 306.1                 | 377.6                | 27.5                                           | 23.0                                |
| 2d                                                | 7256                         | 228.7                 | 272.7                | 31.7                                           | 26.6                                |
| 3d                                                | 7125                         | 189                   | 233                  | 37.7                                           | 30.6                                |
| 6d                                                | 7036                         | 230                   | 252                  | 30.5                                           | 27.9                                |
| 11d                                               | 6518                         | 184                   | 212                  | 35.4                                           | 30.7                                |
| 18d                                               | 6012                         | 176                   | 202                  | 34.2                                           | 29.8                                |
| 21d                                               | 5805                         | 177                   | 188                  | 33                                             | 30.9                                |
| 31d                                               | 5800                         | 175                   | 185                  | 33                                             | 31.3                                |
| 80d                                               | 5630                         | 175                   | -                    | 32                                             | -                                   |

**Table S5.** Aging performance of PAO-PIM-1/UiO-66 (30%) hybrid membrane.

| <b>PAO-PIM-1/UiO66 (30%)</b> | <b>Permeability (barrer)</b> |                       |                      | <b>Ideal selectivity (<math>\alpha</math>)</b> |                                     |                                      |
|------------------------------|------------------------------|-----------------------|----------------------|------------------------------------------------|-------------------------------------|--------------------------------------|
|                              | <b>Aging (days)</b>          | <b>CO<sub>2</sub></b> | <b>N<sub>2</sub></b> | <b>CH<sub>4</sub></b>                          | <b>CO<sub>2</sub>/N<sub>2</sub></b> | <b>CO<sub>2</sub>/CH<sub>4</sub></b> |
|                              | 1d                           | 8126                  | 361                  | 442                                            | 22.5                                | 18.4                                 |
|                              | 7d                           | 6300                  | 252                  | 289                                            | 25                                  | 21.8                                 |
|                              | 14d                          | 4791                  | 181                  | 207                                            | 26.5                                | 23.1                                 |
|                              | 21d                          | 4230                  | 156                  | 174                                            | 27.2                                | 24.3                                 |
|                              | 28d                          | 3850                  | 137                  | 153                                            | 28.1                                | 25.1                                 |

**Table S6.** Aging performance of PIM-1/NH<sub>2</sub>-UiO-66 (30%) hybrid membrane.

| <b>PIM-1/NH<sub>2</sub>-UiO66 (30%)</b> | <b>Permeability (barrer)</b> |                       |                      | <b>Ideal selectivity (<math>\alpha</math>)</b> |                                     |                                      |
|-----------------------------------------|------------------------------|-----------------------|----------------------|------------------------------------------------|-------------------------------------|--------------------------------------|
|                                         | <b>Aging (days)</b>          | <b>CO<sub>2</sub></b> | <b>N<sub>2</sub></b> | <b>CH<sub>4</sub></b>                          | <b>CO<sub>2</sub>/N<sub>2</sub></b> | <b>CO<sub>2</sub>/CH<sub>4</sub></b> |
|                                         | 1                            | 9420                  | 603                  | 768                                            | 15.6                                | 12.3                                 |
|                                         | 7d                           | 6639                  | 354                  | 451                                            | 18.8                                | 14.7                                 |
|                                         | 14d                          | 6010                  | 286                  | 369                                            | 20                                  | 16.3                                 |
|                                         | 21d                          | 5382                  | 256                  | 313                                            | 21.0                                | 17.2                                 |
|                                         | 28d                          | 4782                  | 210                  | 256                                            | 22.7                                | 18.7                                 |
